# Supplementary material for: Control of Pore Sizes in Epoxy Monoliths and Applications as Sheet-Type Adhesives in Combination with Conventional Epoxy and Acrylic Adhesives
Source: MDPI journal article supplement (doi:10.3390/molecules29092059), 2024-04-29
Supplement: s1 [file s1]

## **Supplementary materials for Molecules**

### **Control of Pore Sizes in Epoxy Monoliths and Applications as Sheet-type Adhesives in Combination with Conventional Epoxy and Acrylic Adhesives**

Yoshiyuki Kamo and Akikazu Matsumoto

#### **Contents**

**Figure S1.** The procedure for preparing an epoxy monolith sheet.

**Figure S2.** DSC traces for thermal curing of the epoxy systems.

**Figure S3.** Photographs of the fracture surfaces of the test pieces after the tensile test in Figure 8.

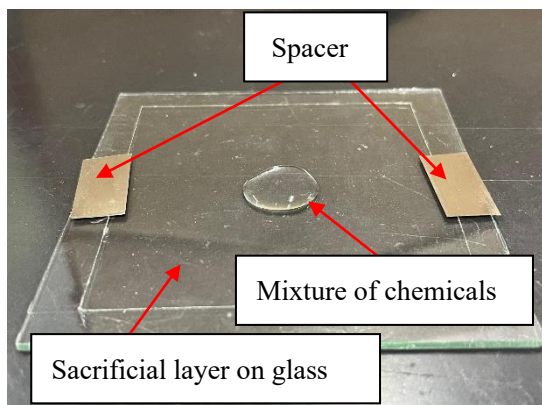

**Step 1.** A mixture of epoxy, amine, porogenic solvent was spread on a glass plate pre-coated with a sacrificial layer of PVA.

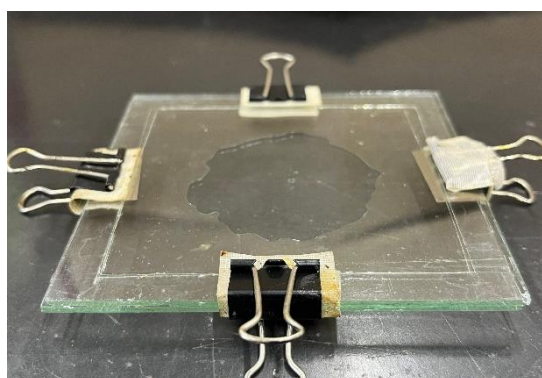

**Step 2.** The mixture was sandwiched with another glass plate while maintaining the desired thickness using spacers and then cured at 130°C for 30 minutes.

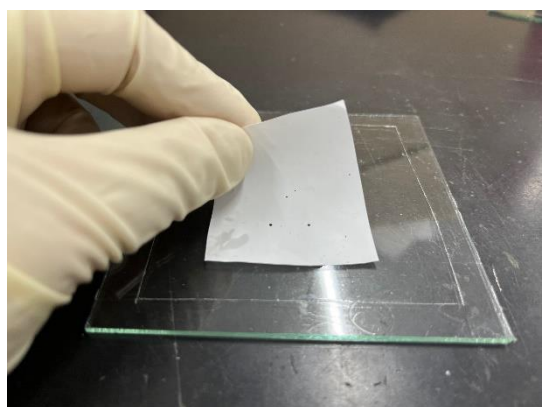

**Step 3.** The monolithic sheet was peeled off the glass after curing. The sheet was washed in ion-exchanged water using ultrasonics for 15 min.

**Figure S1.** The procedure for preparing an epoxy monolith sheet.

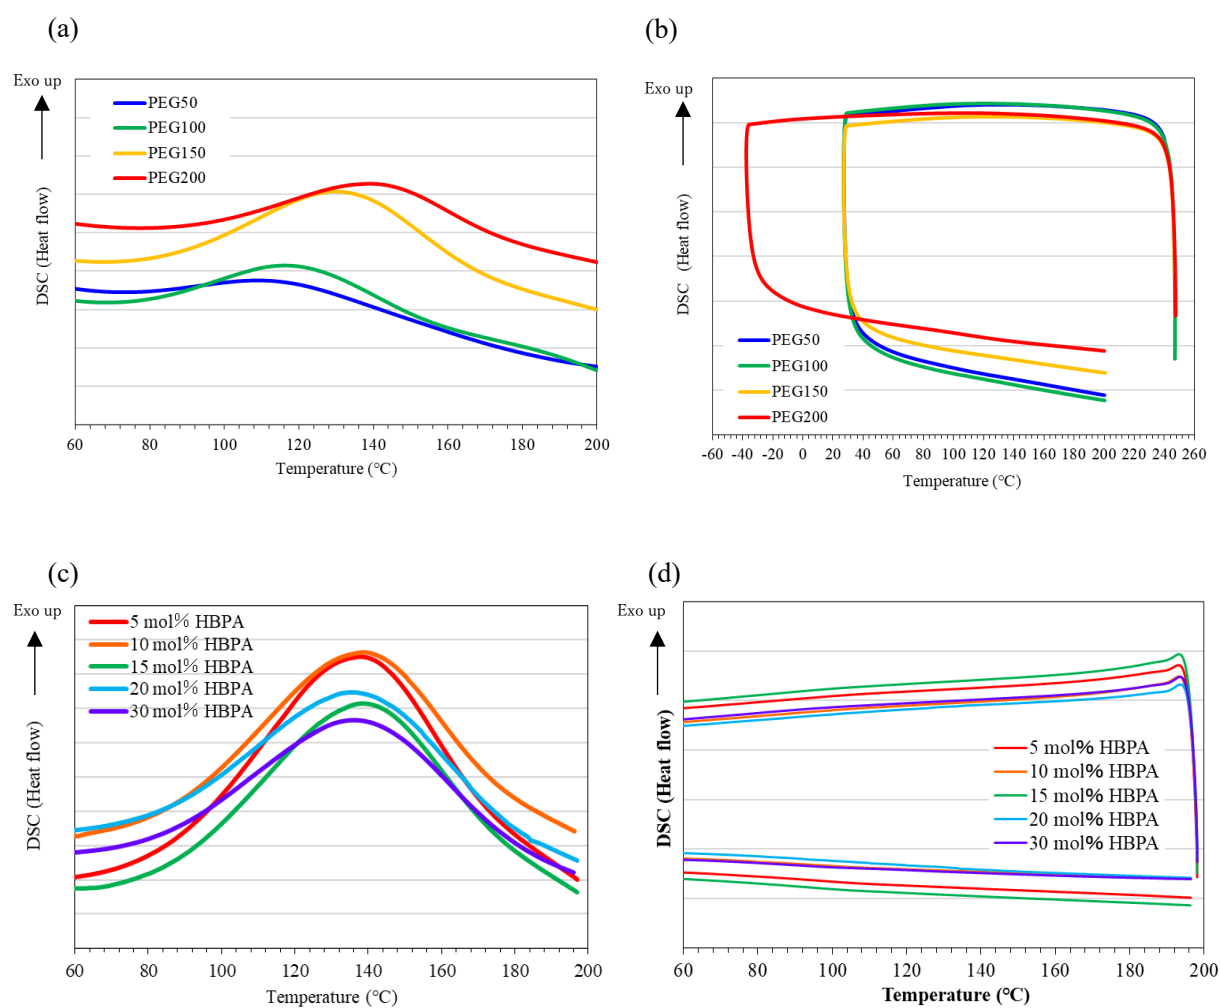

**Figure S2.** DSC traces for thermal curing of the epoxy systems.

(a) Effect of the type of PEGs for the TETRAD-C/BACM/PEG systems and (b) second DSC curve for the same systems. (Initially, we conducted a detailed investigation on PEG200 from -50 to 250°C.)

(c) Effect of the HBPA content for the TETRAD-C/HBPA/BACM/PEG200 system (d) second DSC curve for the same systems.

|                     | Epoxy (CLS-1194)                                                                    | Acryl (AS-6704)                                                                      |
|---------------------|-------------------------------------------------------------------------------------|--------------------------------------------------------------------------------------|
| No monolith         | 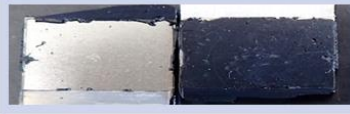   |    |
| PEG100              |    |    |
| PEG150              |    |    |
| PEG200              |    |    |
| PEG200/<br>5% HBPA  |    |    |
| PEG200/<br>10% HBPA |  |  |

**Figure S3.** Photographs of the fracture surfaces of the test pieces after the tensile test in Figure 8.
